# Supplementary material
Source: MDPI journal article supplement (https://www.mdpi.com/2073-4352/8/8/330)
Supplement: s1 [file s1]

# Supplementary Materials: Self-Assembled Structures of Diblock Copolymer/Homopolymer Blends through Multiple Complementary Hydrogen Bonds

Wei-Chen Su, Yu-Shian Wu <sup>1</sup>, Chih-Feng Wang <sup>2</sup> and Shiao-Wei Kuo <sup>1,3,\*</sup>

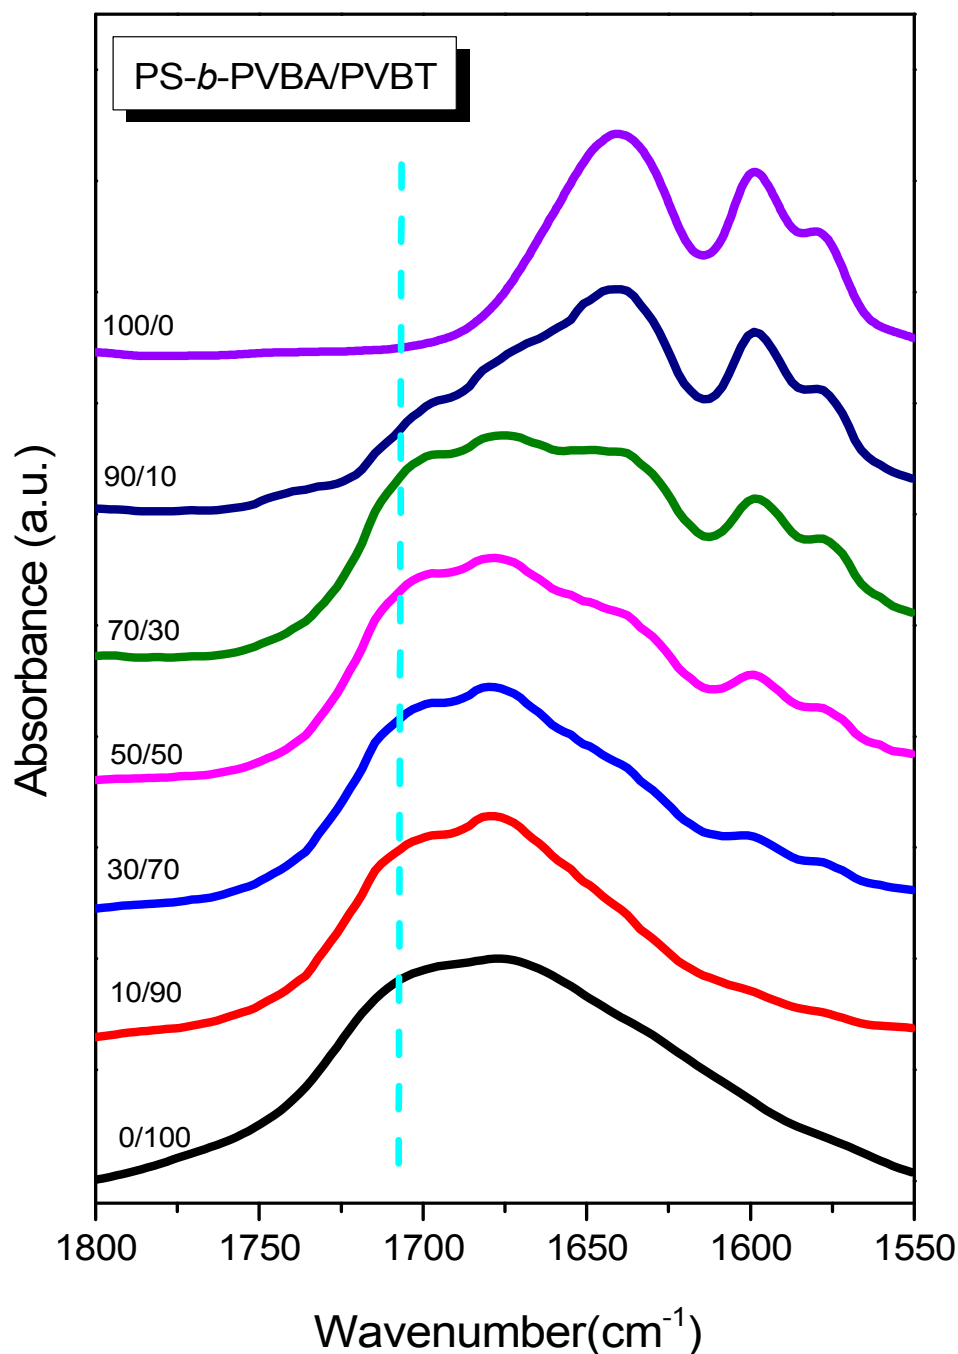

**Figure S1.** Scale expanded FTIR spectra of PS-*b*-PVBA/PVBT diblock copolymer/homopolymer blends with various compositions based on Figure 6.

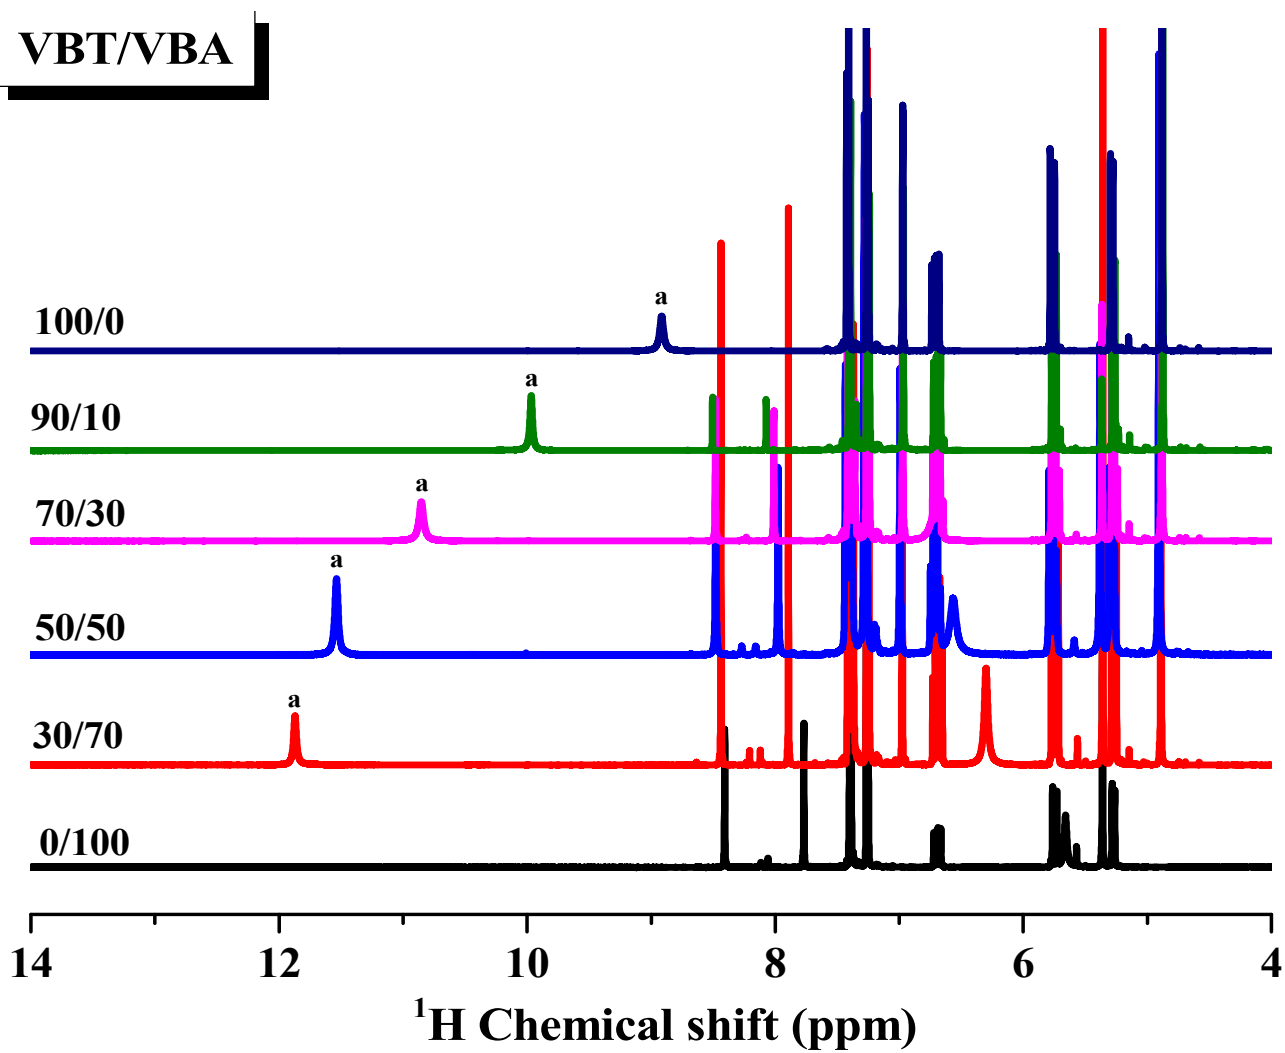

**Figure S2.**  $^1\text{H}$  NMR spectra displaying the chemical shift of the NH groups of VBT/VBA mixtures of various compositions.
